# Supplementary material
Source: PubMed Central journal article supplement (PMC6350771)
Supplement: NIHMS1001708-supplement-Supplemental_Files.pdf [file NIHMS1001708-supplement-Supplemental_Files.pdf]

## SUPPORTING INFORMATION:

### Evaluation of e-vapor nicotine and nicotine concentrations under various e-liquid compositions, device settings, and vaping topographies

Yeongkwon Son<sup>†,1</sup>, Olivia Wackowski<sup>‡,§</sup>, Clifford Weisel<sup>†,#</sup>, Stephan Schwander<sup>†,§,#,∇</sup>, Gediminas Mainelis<sup>⊥</sup>,  
Cristine Delnevo<sup>‡,§</sup>, Qingyu Meng<sup>†,§,#\*</sup>

<sup>†</sup>Department of Environmental and Occupational Health, School of Public Health, Rutgers University, Piscataway, New Jersey 08854, United States

<sup>‡</sup>Department of Health Education & Behavioral Science, School of Public Health, Rutgers University, Piscataway, New Jersey 08854, United States

<sup>§</sup>Center for Tobacco Studies, School of Public Health, Rutgers University, Piscataway, New Jersey 08854, United States

<sup>#</sup>Environmental and Occupational Health Sciences Institute, Rutgers University, Piscataway, New Jersey 08854, United States

<sup>⊥</sup>Department of Environmental Sciences, Rutgers University, New Brunswick, New Jersey 08901, United States

<sup>∇</sup>Department of Urban-Global Public Health Affairs, School of Public Health, Rutgers University, Piscataway, New Jersey 08854, United States

\*Corresponding author: Qingyu Meng, School of Public Health, Rutgers University, 683 Hoes Lane West, Piscataway, NJ 08854. Phone: (732) 235-9754; Fax: (732) 235-4004; Email: mengqi@sph.rutgers.edu

---

<sup>1</sup>Present address: Division of Atmospheric Sciences, Desert Research Institute, Reno, Nevada 89512, United States

**TABLE OF CONTENTS:**

|                                                                                          |                |
|------------------------------------------------------------------------------------------|----------------|
| <b>I. Vaping topography measurements</b>                                                 | <b>Page S3</b> |
| <b>II. The experimental settings for e-cigarette particle generation</b>                 | <b>Page S4</b> |
| <b>III. The calibration curves for nicotine and nicotyrine</b>                           | <b>Page S4</b> |
| <b>IV. Nicotine and nicotyrine analysis using GC/MS/MS method</b>                        | <b>Page S5</b> |
| <b>V. Calibration factors for the sampling artifacts</b>                                 | <b>Page S6</b> |
| <b>VI. Nicotine, nicotyrine and e-vapor mass under different experimental conditions</b> | <b>Page S7</b> |

## I. Vaping topography measurements

The demographics of the study participants are summarized in Table S1.

**Table S1. Summary of the study participants**

|                                     |                                      |
|-------------------------------------|--------------------------------------|
| <b>Number of study participants</b> | 23                                   |
| <b>Age</b>                          | 25 ± 10 (18-52) years                |
| <b>Gender</b>                       | 21 men and 2 women                   |
| <b>Ethnicity</b>                    | 16 White; 1 Black; 3 Asian; 6 others |
| <b>Duration of e-cigarette use</b>  | 1.4 ± 0.9 (0.4-4.0) years            |

Table S2 shows the mean, the standard deviation, and the range of e-cigarette vaping topography, device power output, and nicotine contents of the 23 study participants in our study. E-cigarette device power output ranged from 5 watts to 59.7 watts, with an average power output of 13.7 watts. The average nicotine content in e-liquids was 11.9 ± 10.0 mg/mL, with a maximum nicotine level of 36 mg/ml. Most subjects used vegetable glycerin (VG) based e-liquids (14 participants), followed by PG:VG mixed e-liquids (7 participants), and PG-based e-liquids (2 participants).

**Table S2. Vaping topographies, e-cigarette device power settings, and nicotine contents in e-liquids across the 23 study participants**

| Parameters                 | Mean   | Standard Deviation | Percentiles |       |       |       |        |        |        |
|----------------------------|--------|--------------------|-------------|-------|-------|-------|--------|--------|--------|
|                            |        |                    | Min         | 10    | 25    | 50    | 75     | 90     | Max    |
| <b>Puff volume (mL)</b>    | 100.17 | 55.57              | 9.99        | 38.39 | 63.58 | 90.04 | 135.62 | 160.46 | 251.13 |
| <b>Puff duration (sec)</b> | 3.69   | 1.16               | 1.26        | 2.08  | 3.24  | 3.85  | 4.24   | 5.06   | 5.77   |
| <b>Puff interval (sec)</b> | 24.30  | 17.30              | 8.01        | 11.90 | 13.86 | 18.67 | 26.35  | 67.91  | 69.39  |
| <b>Power (W)</b>           | 13.70  | 15.14              | 5.00        | 5.48  | 6.26  | 7.61  | 12.96  | 27.38  | 59.67  |
| <b>Nicotine (mg/mL)</b>    | 11.92  | 10.04              | 0.00        | 3.00  | 3.00  | 12.00 | 19.50  | 24.00  | 36.00  |

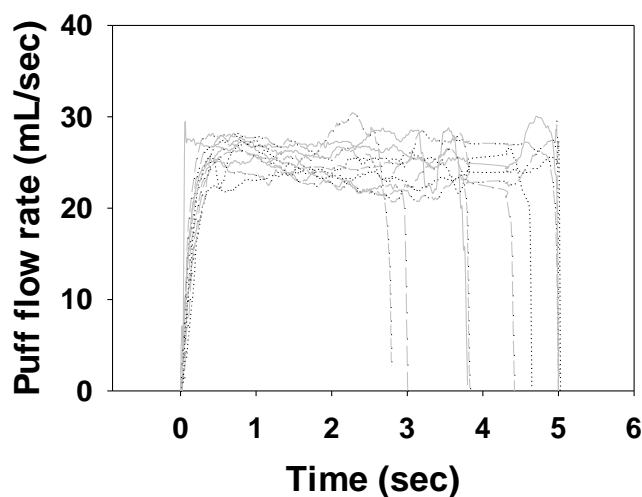

**Figure S1. Observed e-cigarette puff patterns using the Cress pocket device for the study participants**

## II. The experimental settings for e-cigarette particle generation

E-cigarette particles were generated under the following conditions specified in Table S3.

**Table S3. The experimental settings for e-cigarette particle generation**

| Experiments            | Factors             | Settings                  | Other Settings                                                                       |
|------------------------|---------------------|---------------------------|--------------------------------------------------------------------------------------|
| E-liquid bulk material | Base material       | PG, VG, PG&VG (v:v = 1:1) | 6.4 W, 2 mm air hole, 90 mL puff volume, 3.8 sec puff duration                       |
|                        | Nicotine (mg/mL)    | 0, 3, 12, 24, 36          |                                                                                      |
| Device setting         | Device power (watt) | 6.4, 14.7, 31.3           | 2 mm air hole, 90 mL puff volume, 3.8 sec puff duration, and 12 mg/ml nicotine in VG |
| Vaping topography      | Puff volume (mL)    | 35, 90, 170               | 6.4 W, 2 mm air hole and 12 mg/ml nicotine in VG                                     |
|                        | Puff duration (sec) | 2, 3.8                    |                                                                                      |

\*Strawberry (Ripe), dragonfruit, menthol, cinnamon, bubblegum, bavarian cream, sweet cream, and graham cracker

\*\*0.1% and 1% for the cinnamon flavor

## III. The calibration curves for nicotine and nicotyrine

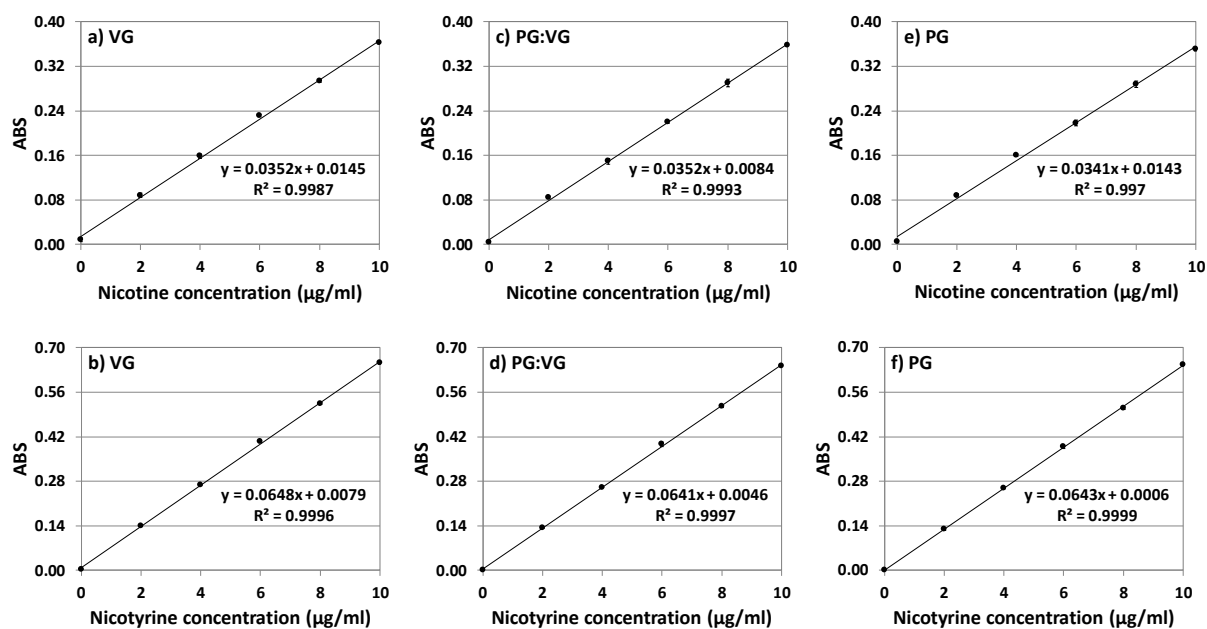

**Figure S2. Nicotine and nicotyrine calibration curves prepared using 100% VG (a, b), 50% of PG and 50% of VG mixture (c, d), and 100% PG based e-liquid (e,f)**

#### IV. Nicotine and nicotine analysis using GC/MS/MS method

In order to measure nicotine and nicotine concentrations of e-vapor using GC/MS/MS, 20 puffs of e-vapor were generated using VG based e-liquid containing 12 mg/ml nicotine under the two different power output conditions (6.4W and 31.3W). Vaping topography was 90 ml puff volume, 3.8-sec puff duration, and 24-sec puff interval. Generated e-vapor was collected on the Teflon filter, and then the sample filter was spiked using 2  $\mu$ l quinoline to have the final concentration of 545  $\mu$ g/ml. Extracted e-vapor with 4 ml of methanol (HPLC grade,  $\geq$ 99.9%, Sigma, St. Louis, MO, USA) was analyzed using multiple reaction monitoring (MRM) mode using the parameters tabulated in Table S4.

**Table S4. GC/MS/MS parameters**

| Compound   | Retention time (min) | Parent (m/z) | Daughter (m/z) | Collision energy (V) |
|------------|----------------------|--------------|----------------|----------------------|
| Quinoline  | 8.59                 | 129          | 77             | 35                   |
|            |                      | 129          | 103            | 25                   |
| Nicotine   | 12.36                | 162          | 84             | 11                   |
| Nicotyrine | 17.71                | 158          | 130            | 28                   |

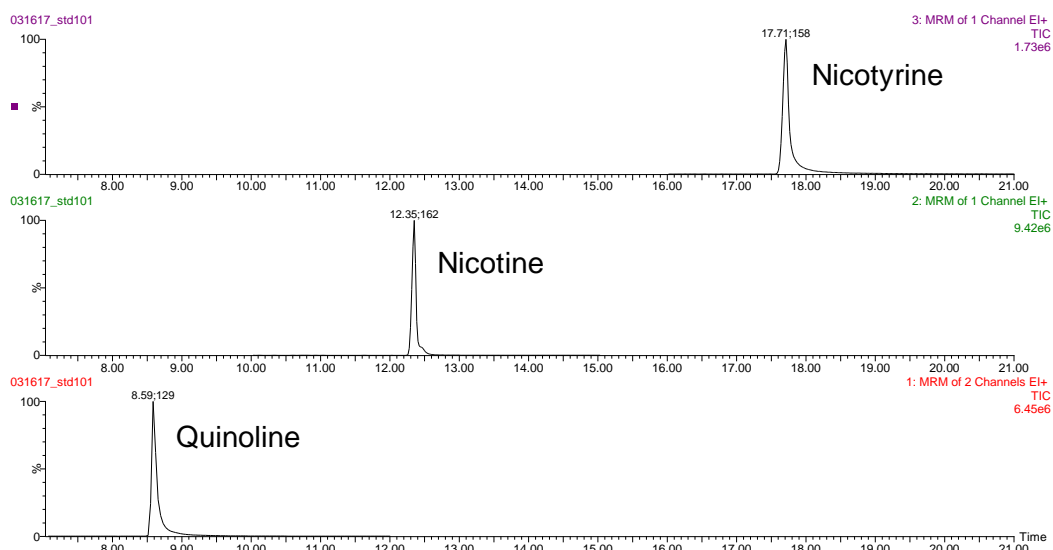

**Figure S3. Chromatographic profiles of quinoline, nicotine, and nicotine**

All GC/MS/MS analysis was performed using the Waters Micromass Quattro micro GC (Waters Corporation, Milford, MA, USA) connected with the Agilent 6890N GC oven (Agilent Technologies, Santa Clara, CA, USA). A DB-5ms column (30 m length, 0.25 mm ID, 0.25  $\mu$ m thickness, Agilent Technologies, Santa Clara, CA, USA) was installed in splitless mode. The GC oven temperature ramp 80  $^{\circ}$ C for 2 min, 4  $^{\circ}$ C/min to 125  $^{\circ}$ C, hold 5 min, 40  $^{\circ}$ C/min to 240  $^{\circ}$ C, hold 5min. Constant flow rate was used with a He flow of 2 ml/min. Figure S2 shows chromatographic profiles of quinoline, nicotine, and nicotine.

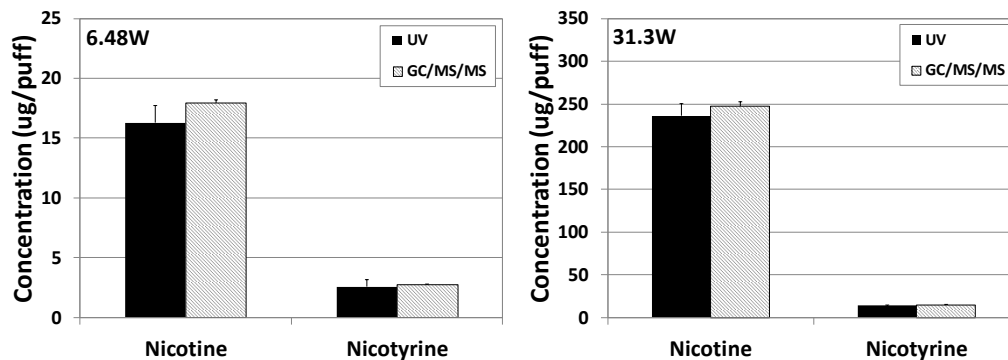

**Figure S4. Nicotine and nicotyrine concentration measured using UV and GC/MS/MS method (N = 3, and error bars are standard deviations of the 5 independent measurements)**

Figure S4 shows nicotine and nicotyrine concentration measured using UV and GC/MS/MS method. Average extraction efficiency was  $99.4 \pm 0.7\%$ . No significant difference was observed between these two methods, with the average difference less than 10%.

#### V. Calibration factors for the sampling artifacts

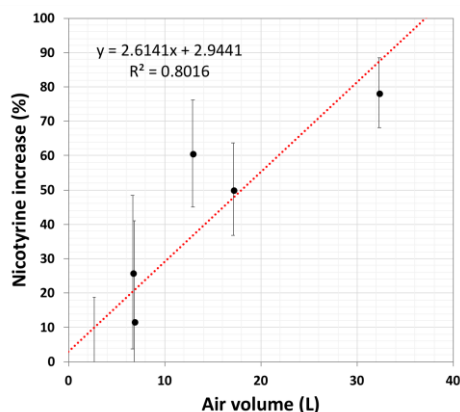

**Figure S5. Linear regression for the introduced air volume (L) into the sample filter and nicotyrine increment (%). Point and error bar indicates mean and standard deviation (n=5)**

**Table S5. Calibration factors for the air introduced into the sample filters**

| Puff duration | Puff volume |       |        |
|---------------|-------------|-------|--------|
|               | 35 ml       | 90 ml | 170 ml |
| 2 sec         | 0.938       | 0.890 | 0.828  |
| 3.8 sec       | 0.910       | 0.828 | 0.731  |

Calibration factors for the sampling artifacts were derived using the relationship between the air introduced into the sample filter (L) and increased nicotyrine by percentage (Figure S5). Estimated calibration factors were tabulated in Table S5. Calibration factors for the e-liquid samples with different nicotine concentrations were 0.423, 0.828, 0.945, and 0.962 for 3, 12, 24, and 36 mg/ml, respectively.

## VI. Nicotine, nicotine, nicotyrine and e-vapor mass under different experimental conditions

**Table S6. Nicotine, nicotyrine, nicotyrine/nicotine ratio, and e-vapor mass of e-cigarette vapor generated from e-liquid with different base material and nicotine contents**

| Base Material | Component                         | Nicotine Contents |                   |                   |                   |
|---------------|-----------------------------------|-------------------|-------------------|-------------------|-------------------|
|               |                                   | 3 mg/mL           | 12 mg/mL          | 24 mg/mL          | 36 mg/mL          |
| VG            | Nicotine ( $\mu\text{g/puff}$ )   | 3.87 $\pm$ 0.51   | 15.74 $\pm$ 2.90  | 30.45 $\pm$ 5.03  | 45.15 $\pm$ 2.67  |
|               | Nicotyrine ( $\mu\text{g/puff}$ ) | 0.19 $\pm$ 0.06   | 1.98 $\pm$ 0.38   | 2.55 $\pm$ 0.35   | 2.59 $\pm$ 0.43   |
|               | Nicotyrine/Nicotine               | 0.050 $\pm$ 0.019 | 0.126 $\pm$ 0.041 | 0.084 $\pm$ 0.019 | 0.057 $\pm$ 0.019 |
|               | E-vapor mass (mg/puff)            | 1.59 $\pm$ 0.21   | 1.53 $\pm$ 0.20   | 1.25 $\pm$ 0.05   | 1.34 $\pm$ 0.27   |
|               | Nicotine (mg/ml)                  | 1.93 $\pm$ 0.36   | 8.19 $\pm$ 1.86   | 19.3 $\pm$ 3.27   | 26.8 $\pm$ 5.68   |
| PG:VG = 1:1   | Nicotine ( $\mu\text{g/puff}$ )   | 4.54 $\pm$ 1.00   | 17.33 $\pm$ 2.23  | 29.5 $\pm$ 2.08   | 43.1 $\pm$ 4.71   |
|               | Nicotyrine ( $\mu\text{g/puff}$ ) | 0.23 $\pm$ 0.05   | 1.67 $\pm$ 0.28   | 2.53 $\pm$ 0.19   | 2.62 $\pm$ 0.25   |
|               | Nicotyrine/Nicotine               | 0.050 $\pm$ 0.096 | 0.096 $\pm$ 0.046 | 0.086 $\pm$ 0.023 | 0.061 $\pm$ 0.011 |
|               | E-vapor mass (mg/puff)            | 1.33 $\pm$ 0.27   | 1.38 $\pm$ 0.42   | 1.41 $\pm$ 0.24   | 1.31 $\pm$ 0.09   |
|               | Nicotine (mg/ml)                  | 2.97 $\pm$ 0.89   | 10.9 $\pm$ 3.61   | 18.3 $\pm$ 3.38   | 28.6 $\pm$ 3.69   |
| PG            | Nicotine ( $\mu\text{g/puff}$ )   | 0.37 $\pm$ 0.03   | 2.13 $\pm$ 0.15   | 3.80 $\pm$ 0.36   | 7.55 $\pm$ 0.38   |
|               | Nicotyrine ( $\mu\text{g/puff}$ ) | 0.01 $\pm$ 0.00   | 0.24 $\pm$ 0.05   | 0.35 $\pm$ 0.11   | 0.72 $\pm$ 0.21   |
|               | Nicotyrine/Nicotine               | 0.025 $\pm$ 0.007 | 0.114 $\pm$ 0.035 | 0.091 $\pm$ 0.035 | 0.096 $\pm$ 0.041 |
|               | E-vapor mass (mg/puff)            | 0.18 $\pm$ 0.03   | 0.16 $\pm$ 0.02   | 0.16 $\pm$ 0.02   | 0.20 $\pm$ 0.05   |
|               | Nicotine (mg/ml)                  | 1.99 $\pm$ 0.33   | 12.7 $\pm$ 2.16   | 23.1 $\pm$ 3.88   | 35.5 $\pm$ 8.19   |

**Table S7. Nicotine, nicotyrine, nicotyrine/nicotine ratio, and e-vapor mass of e-cigarette vapor generated under different E-cigarette device power outputs**

| Component                         | Device Power      |                   |                   |
|-----------------------------------|-------------------|-------------------|-------------------|
|                                   | 6.4 W             | 14.7 W            | 31.3 W            |
| Nicotine ( $\mu\text{g/puff}$ )   | 16.3 $\pm$ 1.44   | 137.1 $\pm$ 6.72  | 236.3 $\pm$ 13.97 |
| Nicotyrine ( $\mu\text{g/puff}$ ) | 2.11 $\pm$ 0.51   | 12.7 $\pm$ 0.34   | 11.6 $\pm$ 0.35   |
| Nicotyrine/Nicotine               | 0.129 $\pm$ 0.043 | 0.092 $\pm$ 0.030 | 0.049 $\pm$ 0.005 |
| E-vapor mass (mg/puff)            | 1.47 $\pm$ 0.22   | 8.90 $\pm$ 2.06   | 21.3 $\pm$ 1.19   |
| Nicotine (mg/ml)                  | 8.82 $\pm$ 1.54   | 8.64 $\pm$ 2.10   | 8.70 $\pm$ 0.71   |

**Table S8. Nicotine, nicotyrine, nicotyrine/nicotine ratio, and e-vapor mass of e-cigarette vapor under different vaping topographies**

| Puff duration | Component                         | Puff volume       |                   |                   |
|---------------|-----------------------------------|-------------------|-------------------|-------------------|
|               |                                   | 35 ml             | 90 ml             | 170 ml            |
| 2 sec         | Nicotine ( $\mu\text{g/puff}$ )   | 3.29 $\pm$ 0.31   | 3.05 $\pm$ 0.26   | 3.53 $\pm$ 0.39   |
|               | Nicotyrine ( $\mu\text{g/puff}$ ) | 0.23 $\pm$ 0.02   | 0.24 $\pm$ 0.01   | 0.23 $\pm$ 0.01   |
|               | Nicotyrine/Nicotine               | 0.069 $\pm$ 0.014 | 0.078 $\pm$ 0.015 | 0.064 $\pm$ 0.033 |
|               | E-vapor mass (mg/puff)            | 0.31 $\pm$ 0.03   | 0.28 $\pm$ 0.03   | 0.33 $\pm$ 0.12   |
| 3.8 sec       | Nicotine (mg/ml)                  | 8.48 $\pm$ 1.18   | 8.68 $\pm$ 1.28   | 8.43 $\pm$ 3.15   |
|               | Nicotine ( $\mu\text{g/puff}$ )   | 10.8 $\pm$ 2.03   | 16.0 $\pm$ 0.74   | 24.4 $\pm$ 1.91   |
|               | Nicotyrine ( $\mu\text{g/puff}$ ) | 2.19 $\pm$ 0.25   | 2.28 $\pm$ 0.38   | 2.65 $\pm$ 0.25   |
|               | Nicotyrine/Nicotine               | 0.202 $\pm$ 0.053 | 0.142 $\pm$ 0.044 | 0.109 $\pm$ 0.017 |
|               | E-vapor mass (mg/puff)            | 0.94 $\pm$ 0.09   | 1.43 $\pm$ 0.26   | 2.25 $\pm$ 0.15   |
|               | Nicotine (mg/ml)                  | 9.13 $\pm$ 1.94   | 8.91 $\pm$ 1.67   | 8.58 $\pm$ 0.88   |
